# Supplementary material for: Cell-Specific Regulation of Inflammatory Cytokines and Acute-Phase Proteins by the Glucocorticoid Receptor
Source: Hindawi journal article supplement (doi:10.1155/2023/4399998), 2023-11-28
Supplement: f2 [file 4399998.f2.pdf]

## Supplemental Table 1: Primers

### Primers for qPCR quantification of mRNA expression

|             |                        |
|-------------|------------------------|
| hCXCL1_for  | CCAGACCCGCCTGCTGAG     |
| hCXCL1_rev  | CCACGGACGCTCCTGCTG     |
| hCXCL2_for  | TGCAGGGAATTCACCTCAAG   |
| hCXCL2_rev  | CTGGTCAGTTGGATTTGCCAT  |
| hCXCL8_for  | GATTTCTGCAGCTCTGTGTGAA |
| hCXCL8_rev  | AGACAGAGCTCTCTTCCATCA  |
| hCXCL10_for | AGCAGAGGAACCTCCAGTCT   |
| hCXCL10_rev | ATGCAGGTACAGCGTACAGT   |
| hCCL2_for   | GAAGCTGTGATCTTCAAGACC  |
| hCCL2_rev   | AGTCTTCGGAGTTTGGGTTTG  |
| hIL1B_for   | CCTGAGCTCGCCAGTGAAA    |
| hIL1B_rev   | GTGGTGGTCGGAGATTCGTA   |
| hCD163_for  | AAGACAGAGACAGCGGCTTG   |
| hCD163_rev  | CTTAAAGGCTGAACTCACTGG  |
| hSAA1_for   | CCAATTACATCGGCTCAGACA  |
| hSAA1_rev   | TGGATATTCTCTTGCCATCG   |
| hHAMP_for   | CCTGACCAGTGGCTCTGTTT   |
| hHAMP_rev   | AGATGGGGAAGTGGGTGTCT   |
| hPAI1_for   | GCAAGGCACCTCTGAGAACT   |
| hPAI1_rev   | CACGTAGGATGGGGGATGGT   |

### Primers for PCR cloning of reporter vectors for human CXC chemokine promoters

|                  |                                    |
|------------------|------------------------------------|
| hCXCL1_Pro_KpnI  | AAAAGGTACCGCGCAGGCTGCCACTCA        |
| hCXCL1_Pro_MluI  | AAAAACGCGTGGGGCTCAGCAGGCGGGTCT     |
| hCXCL2_Pro_KpnI  | AAAAAAGGTACCAGACCTCCTGAGCCCAACA    |
| hCXCL2_Pro_MluI  | AAAAAAACGCGTGTGCGAGGAGGAGAGCTG     |
| hCXCL8_Pro_KpnI  | GGAAGCGGTACCCTTGTCTAACACCTGCCACT   |
| hCXCL8_Pro_MluI  | AAGGGGACGCGTGTTCACACACAGTGAGATGGTT |
| hCXCL10_Pro_KpnI | AAGTGCGGTACCCTTGCCAGTTCAGATCTTTG   |
| hCXCL10_Pro_MluI | AAGAAGACGCGTGGTGCTGAGACTGGAGGTTTC  |

### Primers for site-directed mutagenesis of CXCL2 promoters

|                    |                                   |
|--------------------|-----------------------------------|
| CXCL2_Pro_407bpD_F | TAGATAAGACATGCTGCAGTTC            |
| CXCL2_Pro_407bpD_R | TGTTGGGCTCAGGAGGTC                |
| CXCL2_NFAT_Mut_F   | CTCCGGTACCTCCAGCCCCAACCATGCATAAAA |
| CXCL2_NFAT_Mut_R   | TCCAGGGCCAGCCTAATTCCCGGAGCTCCAGA  |
| CXCL2_Pro_CreMut_F | TCAGACCCGGtaccCACTCGTGAGTGC       |
| CXCL2_Pro_CreMut_R | CTGTCTTGCGTAACTCCC                |
| CXCL2_HNF4_del_F   | AACTGAATTAGATCTTGGCAATGGTC        |
| CXCL2_HNF4_del_R   | TTATTTTAGTTAACAGTGTTGC            |

**Supplemental table 2.** GRE sequences, positions, and the dissimilarity scores of each GRE sequence in the 921 bp human CXCL2 promoter predicted by PROMO, with factor's species limited to human and site's species limited to human.

| GRE Sequence | Position | Dissimilarity score |
|--------------|----------|---------------------|
| CAAAACA      | -893     | 3.76%               |
| CAAAAAA      | -871     | 0.00%               |
| CAAAGAG      | -820     | 3.76%               |
| ATATTTG      | -661     | 7.53%               |
| CAAAGC       | -623     | 8.97%               |
| CAAACAT      | -564     | 7.53%               |
